# Supplementary material for: An anthraquinone-based bismuth–iron metal–organic framework as an efficient photoanode in photoelectrochemical cells
Source: Royal Society of Chemistry journal article supplement (doi:10.1039/d4sc00980k), 2024-01-01
Supplement: d4sc00980k1.pdf [file d4sc00980k1.pdf]

# An anthraquinone-based bismuth-iron Metal-Organic Framework as efficient photoanode in photoelectrochemical cells

Cai Shi,<sup>a</sup> Miguel Gomez-Mendoza,<sup>b</sup> Eloy Gómez de Oliveira,<sup>a</sup> Miguel García-Tecedor,<sup>b</sup> Mariam Barawi,<sup>b</sup> Fátima Esteban-Betegón,<sup>a</sup> Marta Liras,<sup>b</sup> Enrique Gutiérrez-Puebla,<sup>a</sup> Angeles Monge,<sup>a</sup> Víctor A. de la Peña O'Shea<sup>\*b</sup> and Felipe Gándara<sup>\*a</sup>

---

a Dr. C. Shi, Mr. E. Gómez de Oliveira, Dr. F. Esteban, Prof. E. Gutiérrez-Puebla, Prof. A. Monge, Dr. F. Gándara  
Materials Science Institute of Madrid – Spanish National Research Council,  
Sor Juana Inés de la Cruz, 3, 28049, Madrid, Spain  
E-mail: [gandara@icmm.csic.es](mailto:gandara@icmm.csic.es), [victordelapenya@imdea.org](mailto:victordelapenya@imdea.org)

b Dr. M. Barawi, Dr. M. Gomez-Mendoza, Dr. M. García-Tecedor, Dr. M. Liras, Prof. V. A. de la Peña-O'Shea  
<sup>2</sup>Photoactivated Processes Unit  
IMDEA Energy Institute  
Móstoles Technology Park, Avenida Ramón de la Sagra 3, Móstoles, 28935, Madrid, Spain

## Electronic Supporting Information

### Table of contents

## Experimental and computational details

**Table S1** Crystal and structure refinement data for BiPF-10.

**Table S2** Crystal and structure refinement data for BiFePF-5.

**Fig. S1** Comparison of experimental and DFT optimized structure for assignment of hydrogen positions.

**Fig. S2** PXRD analysis of BiPF-10 and BiFePF-15.

**Fig.S3** A and B) SEM images and C) EDS results of BiFePF-15.

**Fig. S4** Thermogravimetical analysis of A) BiPF-10 and B) BiFePF-15 in air.

**Fig. S5** A) UV-vis DRS spectra, B) tauc plots as direct transition for BiPF-10 and BiFePF-15, C) Photoluminescence spectra for 2,6-AQDS and BiPF-10 and BiFePF-15, D) Time-resolved photoluminescence decay traces and corresponding calculated lifetime values.

**Fig. S6** Open circuit potential of A) BiPF-10 and B) BiFePF-15.

**Fig. S7** PXRD patterns of A) BiPF-10, and B) BiFePF-15 before and after soaking in 0.5 M Na<sub>2</sub>SO<sub>3</sub>. C) SEM image of BiFePF-15 after 2 h soaked in 0.5 M Na<sub>2</sub>SO<sub>3</sub>

**Fig. S8** A and B) Transient absorption spectra ( $\lambda_{\text{exc}} = 355 \text{ nm}$ ) for **2, 6-AQDS** ligand in deaerated aqueous solution at different timescales. C) Comparison of transient absorption spectra ( $\lambda_{\text{exc}} = 355 \text{ nm}$ ) for **2, 6-AQDS** ligand by the absence (open) or presence (solid) of O<sub>2</sub> in aqueous solution at different timescales. D) Corresponding normalized transient decay traces ( $\lambda_{\text{exc}} = 355 \text{ nm}$ ) monitored at  $\lambda_{\text{obs}} = 388 \text{ nm}$  (left) or  $\lambda_{\text{obs}} = 480 \text{ nm}$  (right), respectively, for **2, 6-AQDS** ligand by the absence (blue) or presence (red) of O<sub>2</sub>. E and F) Transient decay traces ( $\lambda_{\text{exc}} = 355 \text{ nm}$ ) for **2, 6-AQDS** ligand monitored at (C)  $\lambda_{\text{obs}} = 388 \text{ nm}$  or (D)  $\lambda_{\text{obs}} = 480 \text{ nm}$ , respectively. The fitting curves (blue) have been included in all cases.

**Fig. S9** A and B) Transient absorption spectra ( $\lambda_{\text{exc}} = 355 \text{ nm}$ ) for BiPF-10 MOF in aqueous solution suspension at different timescales under N<sub>2</sub>. C and D) Transient decay traces ( $\lambda_{\text{exc}} = 355 \text{ nm}$ ) for BiPF-10 MOF monitored at (C)  $\lambda_{\text{mon}} = 388 \text{ nm}$  or (D)  $\lambda_{\text{mon}} = 480 \text{ nm}$ , respectively. The fitting curves (blue) have been included in all cases.

**Fig. S10** A and B) Transient absorption spectra ( $\lambda_{\text{exc}} = 355 \text{ nm}$ ) for BiFePF-15 MOF in aqueous solution suspension at different timescales under N<sub>2</sub>. C and D) Transient decay traces ( $\lambda_{\text{exc}} = 355 \text{ nm}$ ) for BiFePF-15 MOF monitored at (C)  $\lambda_{\text{mon}} = 388 \text{ nm}$  or (D)  $\lambda_{\text{mon}} = 480 \text{ nm}$ , respectively. The fitting curves (blue) have been included in all cases.

**Fig. S11** Comparative of the transient decay traces (A and B) and normalized (C and D) after laser excitation at  $\lambda_{\text{exc}} = 355 \text{ nm}$  for 2, 6-AQDS ligand and BiPF-10 and BiFePF-15 MOFs aqueous samples under N<sub>2</sub> monitored at (A and C)  $\lambda_{\text{mon}} = 388 \text{ nm}$  or (B and D)  $\lambda_{\text{mon}} = 480 \text{ nm}$ , respectively.

**Fig. S12** A) Transient absorption spectra ( $\lambda_{\text{exc}} = 355 \text{ nm}$ ) at different timescales and C) comparative of the normalized transient decay traces after laser excitation at  $\lambda_{\text{exc}} = 355 \text{ nm}$  ( $\lambda_{\text{mon}} = 388$  and  $480 \text{ nm}$ ) for 2, 6-AQDS, BiPF-10, and BiFePF-15 in water under  $\text{N}_2$ . B) 2D mapping transient absorption spectra of BiFePF-15 in water under  $\text{N}_2$ .

**Fig. S13** A) Transient absorption spectra ( $\lambda_{\text{exc}} = 355 \text{ nm}$ ) for 2, 6-AQDS ligand in the presence of  $0.5 \text{ M Na}_2\text{SO}_3$  in deaerated aqueous solution at different timescales. B) Comparative of the transient absorption spectrum for 2, 6-AQDS ligand in absence or presence of  $0.5 \text{ M Na}_2\text{SO}_3$  immediately after laser pulse  $0 \mu\text{s}$  or upon  $30 \mu\text{s}$ . The signal for  $0.5 \text{ M Na}_2\text{SO}_3$  is included for comparison. C and D) Transient decay traces ( $\lambda_{\text{exc}} = 355 \text{ nm}$ ) for 2, 6-AQDS ligand monitored at (C)  $\lambda_{\text{mon}} = 385 \text{ nm}$  or (D)  $\lambda_{\text{mon}} = 480 \text{ nm}$ , respectively. The fitting curves (blue) have been included in all cases.

**Fig. S14** A) Transient absorption spectra ( $\lambda_{\text{exc}} = 355 \text{ nm}$ ) for BiPF-10 MOF in the presence of  $0.5 \text{ M Na}_2\text{SO}_3$  in aqueous solution suspension at different timescales under  $\text{N}_2$ . B) Comparative of the transient absorption spectrum for BiPF-10 MOF in absence or presence of  $0.5 \text{ M Na}_2\text{SO}_3$  immediately after laser pulse  $0 \mu\text{s}$  or upon  $30 \mu\text{s}$ . The signal for  $0.5 \text{ M Na}_2\text{SO}_3$  is included for comparison. C and D) Transient decay traces ( $\lambda_{\text{exc}} = 355 \text{ nm}$ ) for BiPF-10 MOF monitored at (C)  $\lambda_{\text{mon}} = 385 \text{ nm}$  or (D)  $\lambda_{\text{mon}} = 480 \text{ nm}$ , respectively. The fitting curves (blue) have been included in all cases.

**Fig. S15** A) Transient absorption spectra ( $\lambda_{\text{exc}} = 355 \text{ nm}$ ) for BiFePF-15 MOF in the presence of  $0.5 \text{ M Na}_2\text{SO}_3$  in aqueous solution suspension at different timescales under  $\text{N}_2$ . B) Comparative of the transient absorption spectrum for BiFePF-15 MOF in absence or presence of  $0.5 \text{ M Na}_2\text{SO}_3$  immediately after laser pulse  $0 \mu\text{s}$  or upon  $30 \mu\text{s}$ . The signal for  $0.5 \text{ M Na}_2\text{SO}_3$  is included for comparison. C and D) Transient decay traces ( $\lambda_{\text{exc}} = 355 \text{ nm}$ ) for BiFePF-15 MOF monitored at (C)  $\lambda_{\text{mon}} = 385 \text{ nm}$  or (D)  $\lambda_{\text{mon}} = 480 \text{ nm}$ , respectively. The fitting curves (blue) have been included in all cases.

**Fig. S16** Comparative of the transient decay traces (A) and normalized (B) after laser excitation at  $\lambda_{\text{exc}} = 355 \text{ nm}$  ( $\lambda_{\text{mon}} = 520 \text{ nm}$ ) for 2, 6-AQDS ligand and BiPF-10 and BiFePF-15 MOFs in the presence of aqueous  $\text{Na}_2\text{SO}_3$   $0.5 \text{ M}$  under  $\text{N}_2$ .

**Fig. S17** Comparative transient absorption spectra ( $\lambda_{\text{exc}} = 355 \text{ nm}$ ) for A) 2, 6-AQDS, B) BiPF-10 and C) BiFePF-15 in the presence of  $0.5 \text{ M Na}_2\text{SO}_3$  in aqueous solution suspension at different timescales under  $\text{N}_2$ .

**Fig. S18** UV-Vis spectra of BiFePF-15 and TD-DFT (6-31G\*\*) calculated excitation energies (vertical bars) and selected molecular orbitals contributing to ligand metal charge transfer transitions.

**Table S3** Summary of bare MOFs as photo-electrocatalyst for  $\text{H}_2$  production in reported publications.

**References.**

## Experimental details

**MOF Synthesis.** The two new materials were synthesized by microwave-assisted heating and conventional hydrothermal heating. BiPF-10 was prepared under microwave assisted heating (Microwave Synthesizer, Discover<sup>®</sup>, CEM Corporation, US). Bi(NO<sub>3</sub>)<sub>3</sub>·5H<sub>2</sub>O (0.100 g, 0.2 mmol, from Alfa Aesar, 98% purity), and 2, 6-AQDS (0.086 g, 0.2 mmol, Fluka, HPLC grade) were dissolved in 3.7 mL of distilled water and 300 μL methylsulfonic acid (CH<sub>3</sub>SO<sub>3</sub>H, Fluka). The mixture was heated at 180 °C for 1 h, under stirring, with 260 psi of pressure and 200 W power, after cooling to room temperature, yellow, sheet-like crystals were obtained, centrifuged and consecutively washed with 10 mL of water, ethanol, and acetone. BiFePF-15 was synthesized by dissolving Bi(NO<sub>3</sub>)<sub>3</sub>·5H<sub>2</sub>O (0.097 g, 0.2 mmol), Fe(NO<sub>3</sub>)<sub>3</sub>·9H<sub>2</sub>O (0.081 g, 0.2 mmol, Alfa Aesar, 98% purity), and 2, 6-AQDS disodium salt (0.083 g, 0.2 mmol) in 10 mL of distilled water and 200 μL of concentrated nitric acid (HNO<sub>3</sub>, Scharlau). The solution was transferred to a Teflon-lined steel autoclave and heated at 150 °C for 48 h in a pre-heated oven. After cooling down to room temperature, orange, sheet shaped crystals were isolated by centrifugation and consecutively washed with 10 mL of water, ethanol, and acetone.

**Single Crystal X-ray Diffraction.** Crystals were selected with a polarized optical microscope for a single crystal X-ray diffraction experiment. Single crystal X-ray data were collected in Bruker four circle κ-diffractometer equipped with a Cu INCOATED microsource, operated at 30 W power (45 kV, 0.60 mA) to generate Cu Kα radiation ( $\lambda = 1.54178 \text{ \AA}$ ), and a Bruker Photon III area detector. Diffraction data were collected exploring over the reciprocal space in a combination of  $\varphi$  and  $\omega$  scans to reach a resolution of 0.85 Å, with a completeness > 95%, and redundancy > 3. For this, either a generic quadrant collection strategy or a specific one determined using Bruker APEX4 software suite was used. The exposure time was adjusted based on the size and diffracting quality of the specimens, each exposure covering 1° in  $\omega$  or  $\varphi$ . Unit cell dimensions were determined for least-squares fit of reflections with  $I > 4\sigma$ . The structures were solved by intrinsic phasing or direct methods, implemented in SHELX package. The hydrogen atoms were fixed at their calculated positions using distances and angle constraints. All calculations were performed using APEX4 software for data collection and OLEX2 and SHELXTL22 to resolve and refine the structure. All non-hydrogen atoms were anisotropically refined.

**Powder X-ray Diffraction.** Powder X-ray diffraction (PXRD) patterns were measured with a Bruker D8 diffractometer with a copper source operated at 1600 W, with step size = 0.02° and exposure time = 0.5 s/step from 4° to 50°.

**Ultraviolet-Visible Diffuse Reflectance Spectroscopy.** Ultraviolet–visible diffuse reflectance spectra (UV–vis DRS) of the solid powdered samples were obtained in a Perkin Elmer Lambda 1050 UV/Vis/NIR. The experiments were performed in the range of 250-700 nm.

**Photoluminescence.** Photoluminescence experiments of solid samples (2, 6-AQDS, BiPF-10 and BiFePF-15) were carried out with a Fluorescence Spectrometer Perkin Elmer LS 55, with an excitation wavelength of 372 nm and using a cut-off filter at 430 nm in front face mode. The experiments were carried out in the range of 382-900 nm.

**Time-Resolved Photoluminescence Spectroscopy.** Decay curves of solid 2, 6-AQDS, BiPF-10, and BiFePF-15 were performed with Edinburgh Instruments Mini- $\tau$  (EPL-375). According to the photoluminescence emission spectrum of BiFePF-15, we chose an excitation wavelength of 372 nm, and detected through a band-pass filter in the range between 425-475 nm. The photoluminescence lifetimes were fitted by the decay curves, and calculated by *Equation 1*:

$$\langle \tau \rangle = \{\sum(A_i\tau_i)^2\} / \sum(A_i\tau_i) \quad \text{Equation 1}$$

**Transient Absorption Spectroscopy (TAS) Measurements.** Experiments were performed using a laser flash photolysis LP980 equipment from Edinburgh Instruments (LP980), based on an optical parametric oscillator (OPO) pumped by the third harmonic of a Nd:YAG laser (EKSPLA). The selected excitation wavelength for the measurements was 355 nm with single low energy pulses of 1 mJ per pulse of  $\approx 5$  ns duration, while a pulsed xenon flash lamp (150 W) was employed as detecting light source. The probe light is dispersed through a monochromator (TMS302-A, grating 150 lines  $\text{mm}^{-1}$ ) after it has passed the sample and then reaches a PMT detector (Hamamatsu Photonics) to obtain the temporal profile. The absorbance of all samples was kept at  $\approx 0.3$  at  $\lambda_{\text{exc}} = 355$  nm as dispersed aqueous solutions. Measurements were conducted in absence or presence of 0.5 M  $\text{Na}_2\text{SO}_3$  as sacrificial agent to simulate the reaction media in photocatalytic  $\text{H}_2$  evolution studies. Since the measurements for BiPF-10 and BiFePF-15 MOFs were in aqueous dispersions, poor signal-noise was obtained at the detection limit of the transient between 300-400 nm, thus being the lifetime monitored at 520 nm more accurate (Figure S16). All transient spectra were recorded at room temperature using  $10 \times 10 \text{ mm}^2$  quartz cells, which were bubbled for 15 min with  $\text{N}_2$  before acquisition.

**Photoelectrochemical Measurements.** Experiments were performed in a three-electrode glass cell with a quartz window containing 0.5 M sodium sulfite aqueous solution ( $\text{Na}_2\text{SO}_3$ , pH = 9) for photoelectrochemical and electrochemical measurements, respectively. Platinum wire was employed as counter electrode, while the reference was an Ag/AgCl electrode. The working electrode was prepared by dispersing MOF (8.5 mg) in isopropanol (1 mL) with 50  $\mu\text{L}$  Nafion and depositing 30  $\mu\text{L}$  of the suspension by drop-casting on fluorine doped tin oxide (FTO) cover glasses ( $1 \text{ cm} \times 1 \text{ cm}$ ). Voltage and current density (under dark and illumination condition) were recorded with a potentiostat-galvanostat PGSTAT204 provided with an integrated impedance module FRAIL. A solar simulator (lot LSH302 Xe lamp and an LSZ389 AM1.5 global filter) was utilized as a light source.

For photoelectrochemical  $\text{H}_2$  production experiments,  $50 \text{ cm}^3 \text{ STP min}^{-1}$  of argon flow was passed through the  $\text{Na}_2\text{SO}_3$  aqueous solution (0.5 M) during the reaction

to purge the system, also to act as a carrier gas. In this specific configuration,  $\text{Na}_2\text{SO}_3$  is photoelectrocatalytically oxidized (acting as hole scavenger) in the BiFePF-15 electrode while  $\text{H}_2$  is produced at Pt wire using the photogenerated electrons at the photoanode. The cell was connected to a gas chromatograph (Agilent micro-GC 490) equipped with a MS5A column with a temperature of 60 °C and a TCD detector to quantify  $\text{H}_2$ .

**Theoretical calculations.** Periodic density functional theory (DFT) calculations for geometry and electronic structure were carried out using Viena ab initio simulation package (VASP). The total energies of the optimized geometries were estimated using the spin polarized version of the Perdew–Burke–Ernzerhof (PBE). A more accurate energy gap was fitted using the Heyd-Scuseria-Enzerhof hybrid functional (HSE06) with a mixing parameter of 0.25. A cut-off of 500 eV was set for the kinetic energy of the plane-waves to ensure a total energy and force convergence higher than  $10^{-4}$  eV and  $0.01 \text{ eV}/\text{\AA}^3$ , respectively. Optoelectronics properties of BiFePF-15 were calculated using Time dependent Density Functional Theory (TD-DFT) implemented in the software Gaussian 09 employing a PBE0 functional. The standard 6–31G(d,p) basis set of double split valence plus polarization functions also on H atoms was chosen. Moreover, a fix number of 500 states were selected for a proper comparison between all configurations and models.

**Table S1** Crystal and structure refinement data for BiPF-10.

|                                                              |                                                                              |
|--------------------------------------------------------------|------------------------------------------------------------------------------|
| Identification code                                          | BiPF-10                                                                      |
| Empirical formula                                            | C <sub>14</sub> H <sub>8</sub> BiO <sub>10</sub> S <sub>2</sub>              |
| Formula weight                                               | 609.28                                                                       |
| Temperature/K                                                | 250.0                                                                        |
| Crystal system                                               | triclinic                                                                    |
| Space group                                                  | <i>P</i> -1                                                                  |
| <i>a</i> /Å                                                  | 5.5635(2)                                                                    |
| <i>b</i> /Å                                                  | 9.3426(3)                                                                    |
| <i>c</i> /Å                                                  | 15.4190(5)                                                                   |
| $\alpha$ /°                                                  | 98.5980(10)                                                                  |
| $\beta$ /°                                                   | 96.2630(10)                                                                  |
| $\gamma$ /°                                                  | 103.8970(10)                                                                 |
| Volume/Å <sup>3</sup>                                        | 760.41(4)                                                                    |
| <i>Z</i>                                                     | 2                                                                            |
| $\rho_{\text{calc}}$ /cm <sup>3</sup>                        | 2.628                                                                        |
| $\mu$ /mm <sup>-1</sup>                                      | 25.917                                                                       |
| <i>F</i> (000)                                               | 559.0                                                                        |
| Crystal size/mm <sup>3</sup>                                 | 0.05 × 0.05 × 0.03                                                           |
| Radiation                                                    | CuK $\alpha$ ( $\lambda$ = 1.54184)                                          |
| 2 $\Theta$ range for data collection/°                       | 9.918 to 130.404                                                             |
| Index ranges                                                 | -6 ≤ <i>h</i> ≤ 6, -10 ≤ <i>k</i> ≤ 10, -18 ≤ <i>l</i> ≤ 18                  |
| Reflections collected                                        | 10095                                                                        |
| Independent reflections                                      | 2571 [ <i>R</i> <sub>int</sub> = 0.0397, <i>R</i> <sub>sigma</sub> = 0.0321] |
| Data/restraints/parameters                                   | 2571/0/245                                                                   |
| Goodness-of-fit on <i>F</i> <sup>2</sup>                     | 1.103                                                                        |
| Final <i>R</i> indexes [ <i>I</i> ≥ 2 $\sigma$ ( <i>I</i> )] | <i>R</i> <sub>1</sub> = 0.0230, <i>wR</i> <sub>2</sub> = 0.0679              |
| Final <i>R</i> indexes [all data]                            | <i>R</i> <sub>1</sub> = 0.0238, <i>wR</i> <sub>2</sub> = 0.0686              |
| Largest diff. peak/hole / e Å <sup>-3</sup>                  | 0.99/-2.35                                                                   |

**Table S2** Crystal and structure refinement data for BiFePF-15.

|                                               |                                                               |
|-----------------------------------------------|---------------------------------------------------------------|
| Identification code                           | BiFePF-15                                                     |
| Empirical formula                             | $C_{28}H_{12}Bi_2Fe_2O_{23}S_4$                               |
| Formula weight                                | 1374.28                                                       |
| Temperature/K                                 | 250.15                                                        |
| Crystal system                                | monoclinic                                                    |
| Space group                                   | $C2/c$                                                        |
| $a/\text{\AA}$                                | 32.9343(14)                                                   |
| $b/\text{\AA}$                                | 6.5367(3)                                                     |
| $c/\text{\AA}$                                | 15.9709(7)                                                    |
| $\alpha/^\circ$                               | 90                                                            |
| $\beta/^\circ$                                | 93.5630(10)                                                   |
| $\gamma/^\circ$                               | 90                                                            |
| Volume/ $\text{\AA}^3$                        | 3431.6(3)                                                     |
| Z                                             | 4                                                             |
| $\rho_{\text{calc}}/\text{g/cm}^3$            | 2.660                                                         |
| $\mu/\text{mm}^{-1}$                          | 29.607                                                        |
| F(000)                                        | 2584.0                                                        |
| Crystal size/ $\text{mm}^3$                   | $0.01 \times 0.01 \times 0.01$                                |
| Radiation                                     | $\text{CuK}\alpha$ ( $\lambda = 1.54178$ )                    |
| $2\Theta$ range for data collection/ $^\circ$ | 12.036 to 130.268                                             |
| Index ranges                                  | $-38 \leq h \leq 38, -7 \leq k \leq 7, -17 \leq l \leq 18$    |
| Reflections collected                         | 16185                                                         |
| Independent reflections                       | 2926 [ $R_{\text{int}} = 0.0353, R_{\text{sigma}} = 0.0290$ ] |
| Data/restraints/parameters                    | 2926/0/264                                                    |
| Goodness-of-fit on $F^2$                      | 1.103                                                         |
| Final R indexes [ $I \geq 2\sigma(I)$ ]       | $R_1 = 0.0372, wR_2 = 0.0939$                                 |
| Final R indexes [all data]                    | $R_1 = 0.0372, wR_2 = 0.0939$                                 |
| Largest diff. peak/hole / $e \text{\AA}^{-3}$ | 4.93/-1.74                                                    |



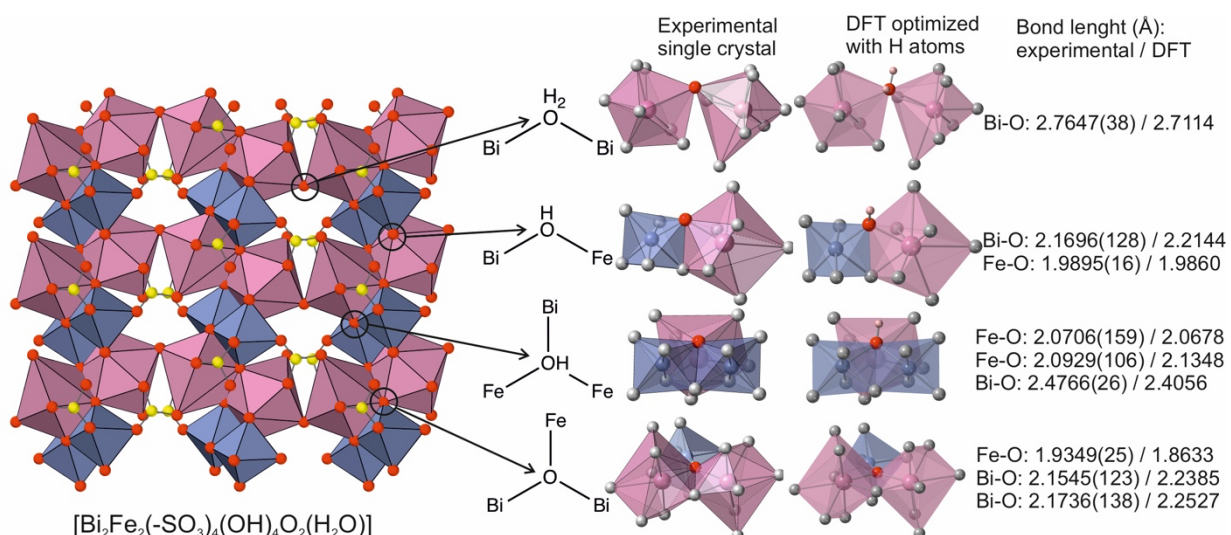

**Fig. S1** Details of the location of hydrogen atoms in the inorganic SBU of BiFePF-15 through DFT based structural optimization.

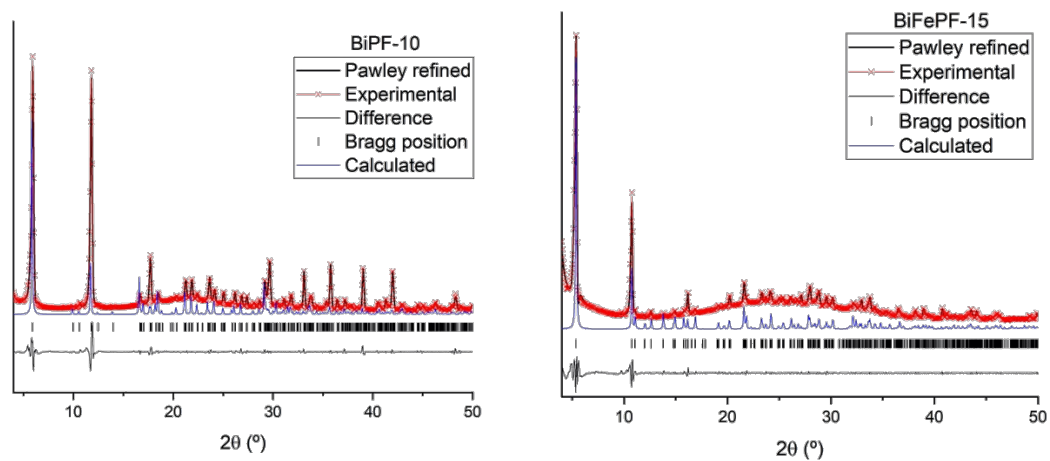

**Fig. S2** Experimental and calculated PXRD patterns, and Pawley refined profiles for BiPF-10 (left) and BiFePF-15 (right).

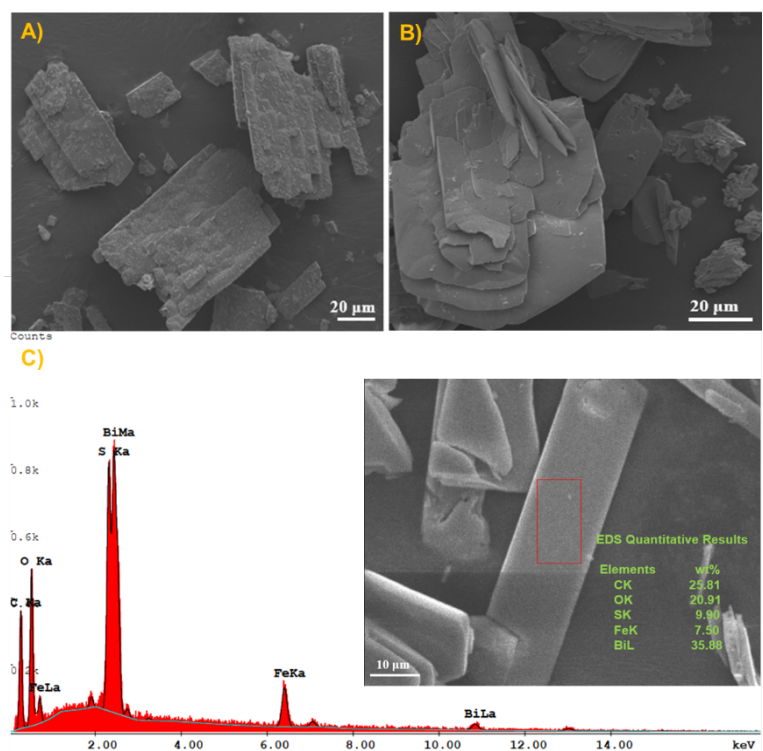

**Fig. S3** SEM images of A) BiPF-10 and B) BiFePF-15; C) EDS results of BiFePF-15. The SEM images were taken with a FESEM FEI Nova NANOSEM 230 microscope under an operating voltage between 5-15 kV. The samples were synthesized by placing the crystals on a conductive carbon tape with double sides, attached to an aluminum sample holder, and later metallized with a layer of gold with 13 nm thick with a Lecia EM ACE200 sputter. EDS microanalysis was conducted under 18 kV with an EDAX Apollo 10-300 mm detector. The points were recorded basically from the body and the basal plane of the crystal. Both BiPF-10 and BiFePF-15 exhibit similar two-dimensional layer shaped crystals (Fig. S3A and B). EDS results of BiFePF-15 demonstrate the presence of bismuth and iron in one crystal (Fig. S3C).

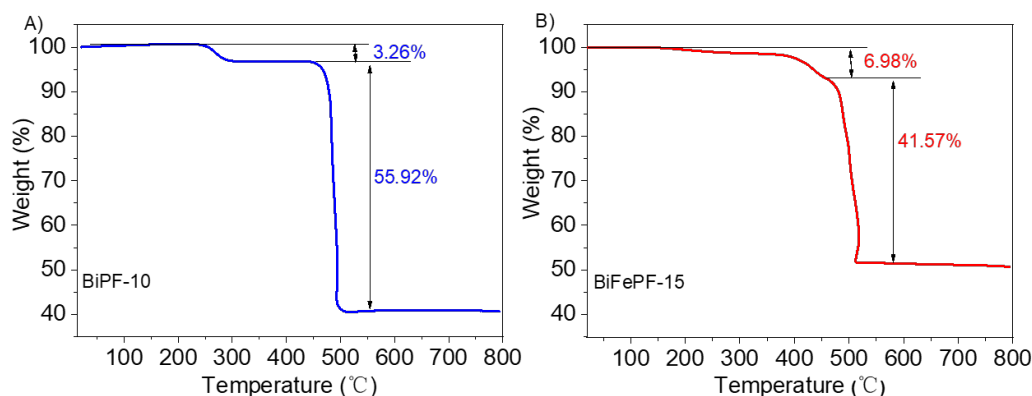

**Fig. S4** Thermogravimetric analysis of A) BiPF-10 and B) BiFePF-15 in air. Thermogravimetric experiments were performed in a SDT Q600 V20.9 Build 20 from TA Instruments with a heating rate of  $10\text{ }^{\circ}\text{C min}^{-1}$  between 25 and  $800\text{ }^{\circ}\text{C}$  under flowing air ( $100\text{ mL min}^{-1}$ ). The experiment of BiPF-10 shows the mass loss of approximately 3.26% corresponding to the evaporation of water molecule, while the decomposition of the linker takes place at  $493\text{ }^{\circ}\text{C}$ . For BiFePF-15, there is no obvious mass loss observed for water molecule. The main weight loss starts at about  $400\text{ }^{\circ}\text{C}$ , until  $520\text{ }^{\circ}\text{C}$ .

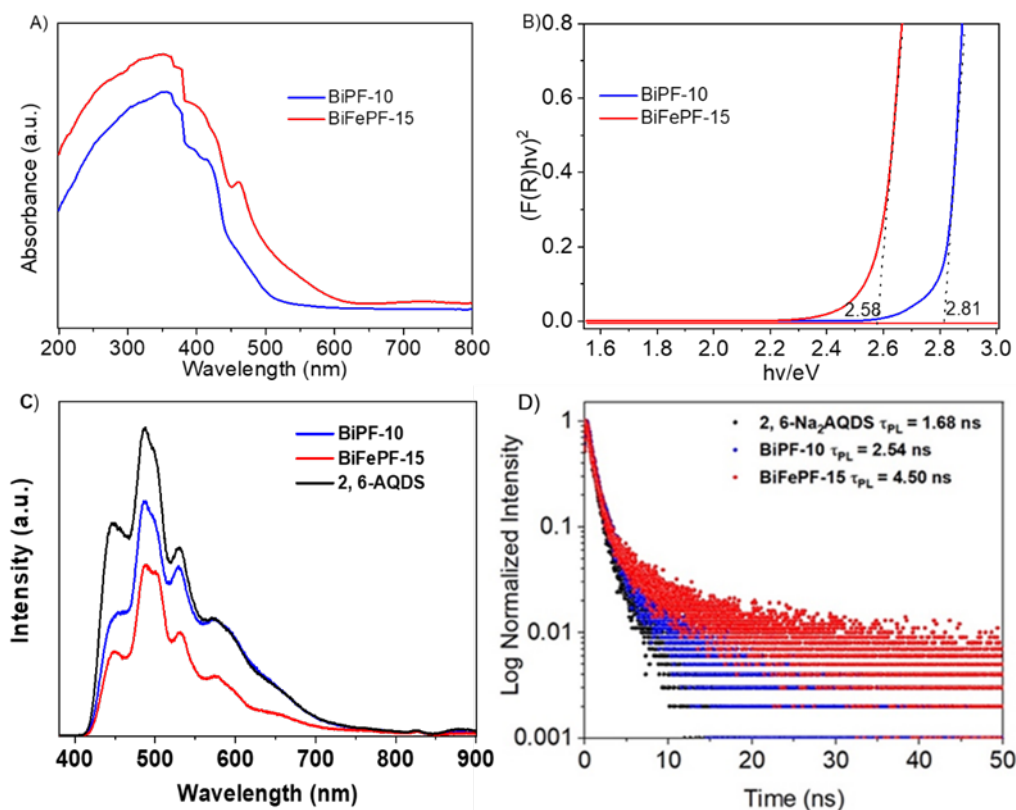

**Fig. S5** A) UV-vis DRS spectra, B) tauc plots as direct transition for BiPF-10 and BiFePF-15, C) Photoluminescence spectra for 2, 6-AQDS and BiPF-10 and BiFePF-15, D) Time-resolved photoluminescence decay traces and corresponding calculated lifetime values.

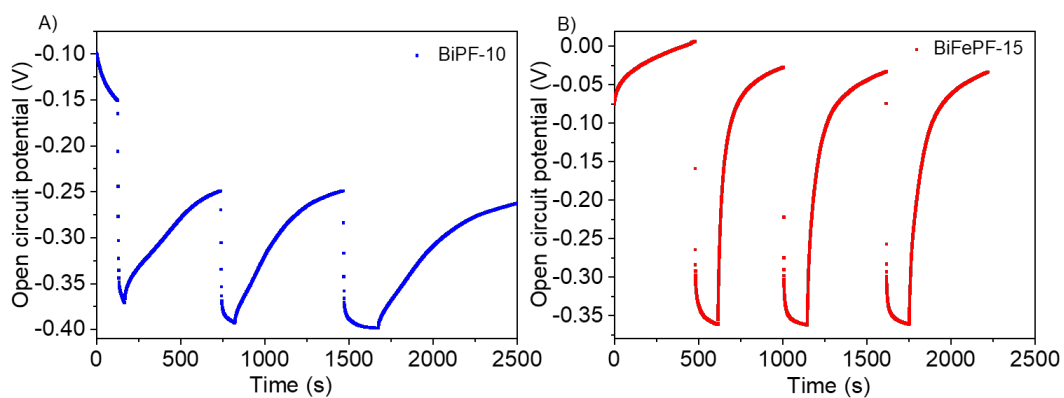

**Fig. S6** Open circuit potential of A) BiPF-10 and B) BiFePF-15.

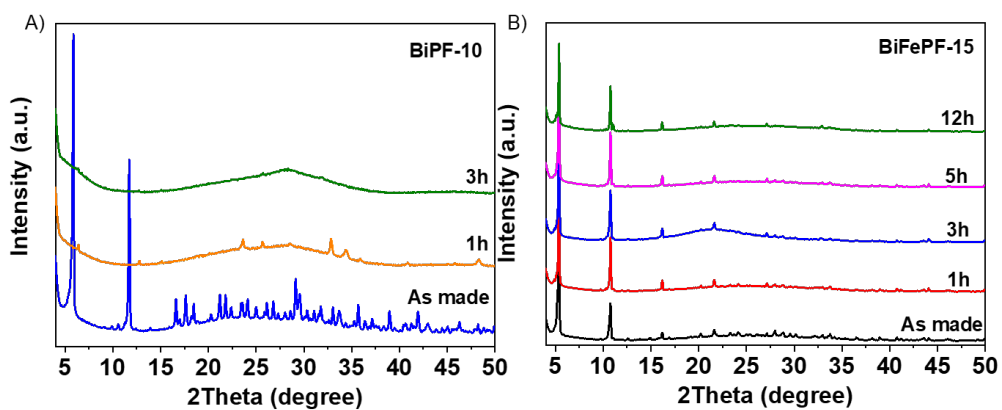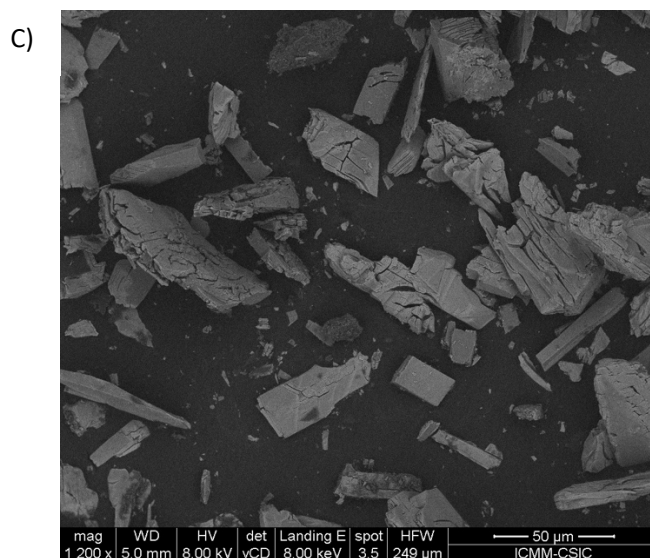

**Fig. S7** PXRD patterns of A) BiPF-10, and B) BiFePF-15 before and after soaking in 0.5 M  $\text{Na}_2\text{SO}_3$  aqueous solution. C) shows SEM image of crystals of BiFePF-15 after 2 h soaked in 0.5 M  $\text{Na}_2\text{SO}_3$  aqueous solution

**TAS Experiments of 2, 6-AQDS in Water.** First, TAS experiments for the 2, 6-AQDS linker dissolved in water were performed. In the case of the aqueous photochemistry of sulphonated anthraquinones all possible reported mechanisms begin with reaction of the triplet due its high intersystem crossing yield ( $\phi_{ISC}=ISC$  0.91), takes 0.4 ps<sup>1,2</sup> and a short-lived singlet.<sup>3,4</sup> The transient absorption spectrum for 2, 6-AQDS was complex, where three species can be observed centered at 388, 480 and 650 nm, respectively (Fig. S8A and S12A). The TAS band at 388 nm corresponds to the triplet <sup>3</sup>2, 6-AQDS\*, whereas the species at 480 and 650 nm correspond to two adducts formed by reaction of the triplet with water.<sup>5</sup> After 1  $\mu$ s, the absorption around 388 and 650 nm decreased sharply (Fig. S8A), whereas the band centered at 480 nm remained strong (Fig. S8B and S11A). We also found that the 480 nm TAS peak hardly changed in O<sub>2</sub> saturated aqueous solution, indicating that the reaction of <sup>3</sup>2, 6-AQDS\* with H<sub>2</sub>O was much faster than the quenching of <sup>3</sup>2, 6-AQDS\* by O<sub>2</sub>. (Figure S8 C and D) Indeed, reported femtosecond (fs)-TAS studies of related molecules revealed that the generation of the peaks centered at 480 nm and 650 nm started upon 10 ps after laser pulse, with continuous blue shift of the 388 nm peak as it slowly decays, and a continuous red shift of the 480 nm peak.<sup>6</sup>

The kinetic analysis of the absorption of the triplet at 360-410 nm and the adduct at 460-520 nm reveals transient lifetimes ( $\tau$ ) of 0.60  $\mu$ s and 7.70  $\mu$ s (Fig. S8E, S8F, and S12C, respectively), although with problem of absorption spectral overlap (Fig. S12A, 2, 6-AQDS).<sup>7,8</sup> The adduct from 600 nm exhibited short-lived lifetime. Harriman et al. first observed triplet of 2, 6-AQDS in aqueous solution with an analogous spectrum to that reported here and with a lifetime of 1  $\mu$ s. The formed adduct at 460-520 nm (with lifetime ca. 5  $\mu$ s) was suggested to be 2, 6-AQDSOH<sup>-</sup> transient.<sup>9</sup>

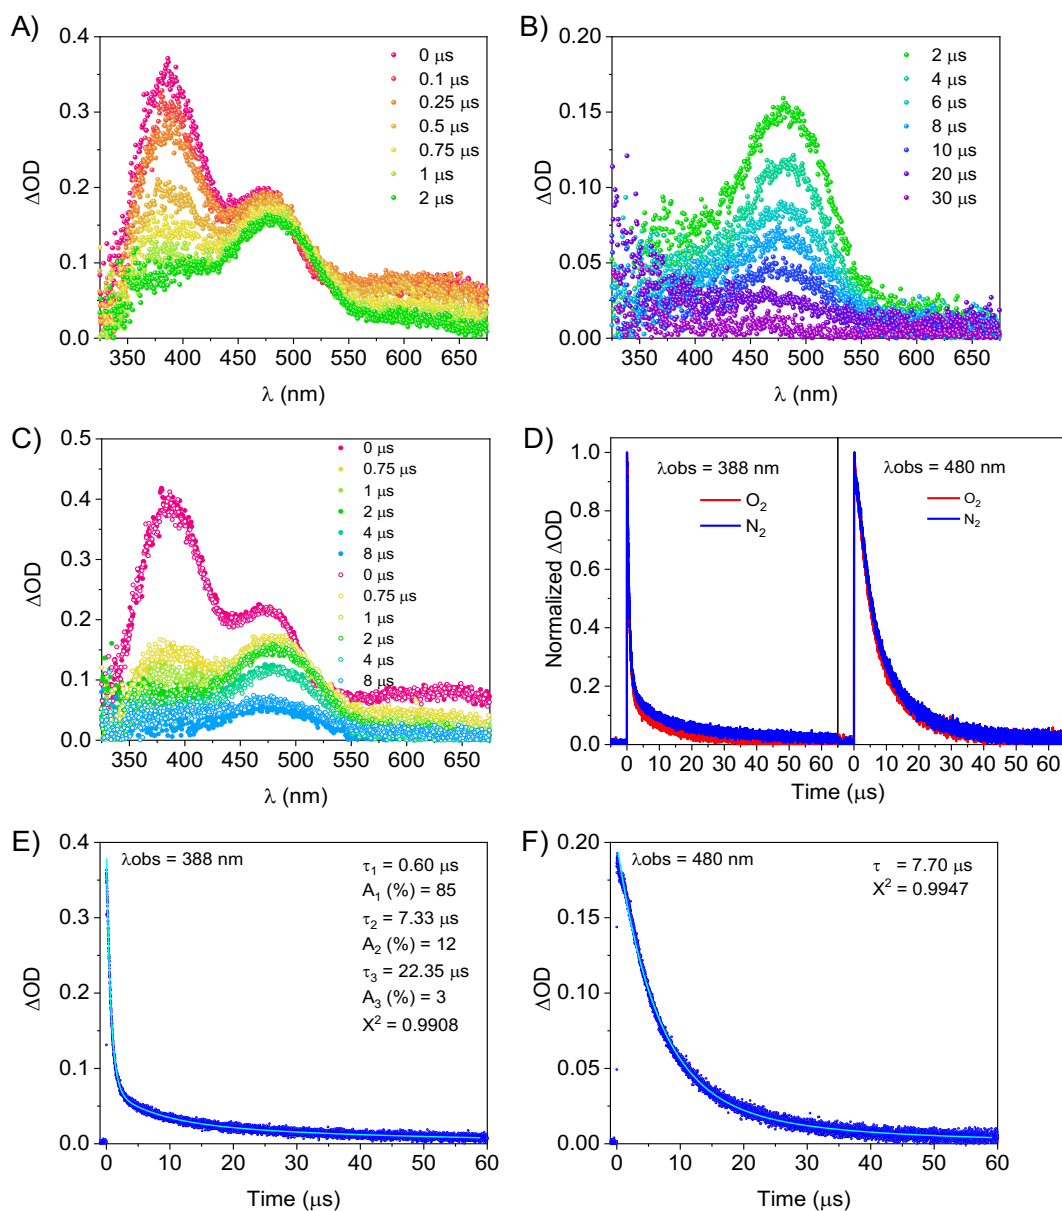

**Fig. S8** A and B) Transient absorption spectra ( $\lambda_{exc} = 355$  nm) for **2, 6-AQDS** ligand in deaerated aqueous solution at different timescales. C) Comparison of transient absorption spectra ( $\lambda_{exc} = 355$  nm) for **2, 6-AQDS** ligand by the absence (open) or presence (solid) of  $O_2$  in aqueous solution at different timescales. D) Corresponding normalized transient decay traces ( $\lambda_{exc} = 355$  nm) monitored at  $\lambda_{obs} = 388$  nm (left) or  $\lambda_{obs} = 480$  nm (right), respectively, for **2, 6-AQDS** ligand by the absence (blue) or presence (red) of  $O_2$ . E and F) Transient decay traces ( $\lambda_{exc} = 355$  nm) for **2, 6-AQDS** ligand monitored at (C)  $\lambda_{obs} = 388$  nm or (D)  $\lambda_{obs} = 480$  nm, respectively. The fitting curves (blue) have been included in all cases.

**TAS Experiments of BiPF-10 and BiFePF-15 in Water.** For BiPF-10 and BiFePF-15 MOFs, analogous TAS spectra were observed compared the naked linker immediately after laser pulse (Fig. S9A, S10A, and S12A). Interestingly, in both MOFs, a more intense absorption band for 480 nm was noticed upon 0.5  $\mu\text{s}$  (Fig. S9A and S10A) and BiFePF-15 exhibited a broad absorption in all spectral range (Fig. S10A and S10B). In addition, comparing the TAS spectra after 30  $\mu\text{s}$ , the differences become more evident (Fig. S12A). Thus, while 2, 6-AQDS seems inactive, BiPF-10 and BiFePF-15 remained photoactive. These differences were clearly monitored measuring the  $\tau$  at 480 nm (Fig. S9D, S10D, S11, and S12C). For both MOFs, a remarkable enhancement of  $\tau$  was observed (11.85 and 19.20  $\mu\text{s}$  for BiPF-10 and BiFePF-15, respectively), confirming a slow-down of the electron-hole pair recombination process.

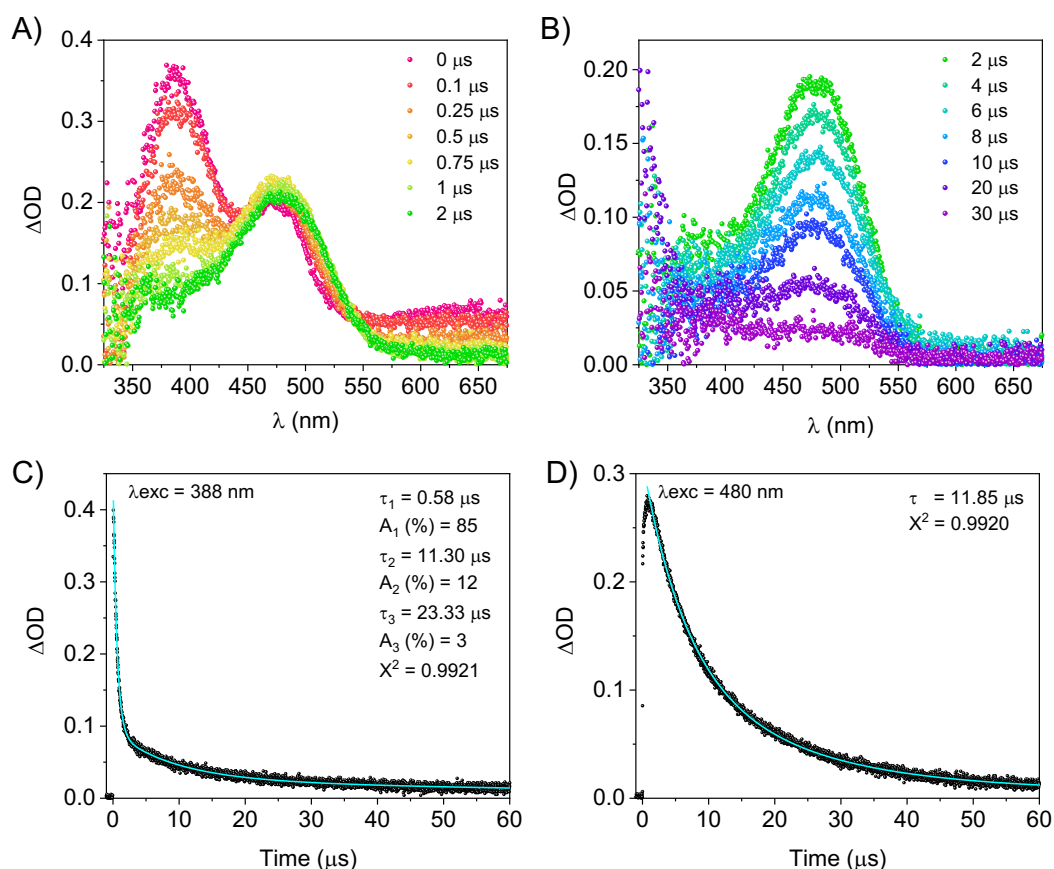

**Fig. S9** A and B) Transient absorption spectra ( $\lambda_{\text{exc}} = 355 \text{ nm}$ ) for **BiPF-10** MOFs in aqueous solution suspension at different timescales under  $\text{N}_2$ . C and D) Transient decay traces ( $\lambda_{\text{exc}} = 355 \text{ nm}$ ) for **BiPF-10** MOFs monitored at (C)  $\lambda_{\text{mon}} = 388 \text{ nm}$  or (D)  $\lambda_{\text{mon}} = 480 \text{ nm}$ , respectively. The fitting curves (blue) have been included in all cases.

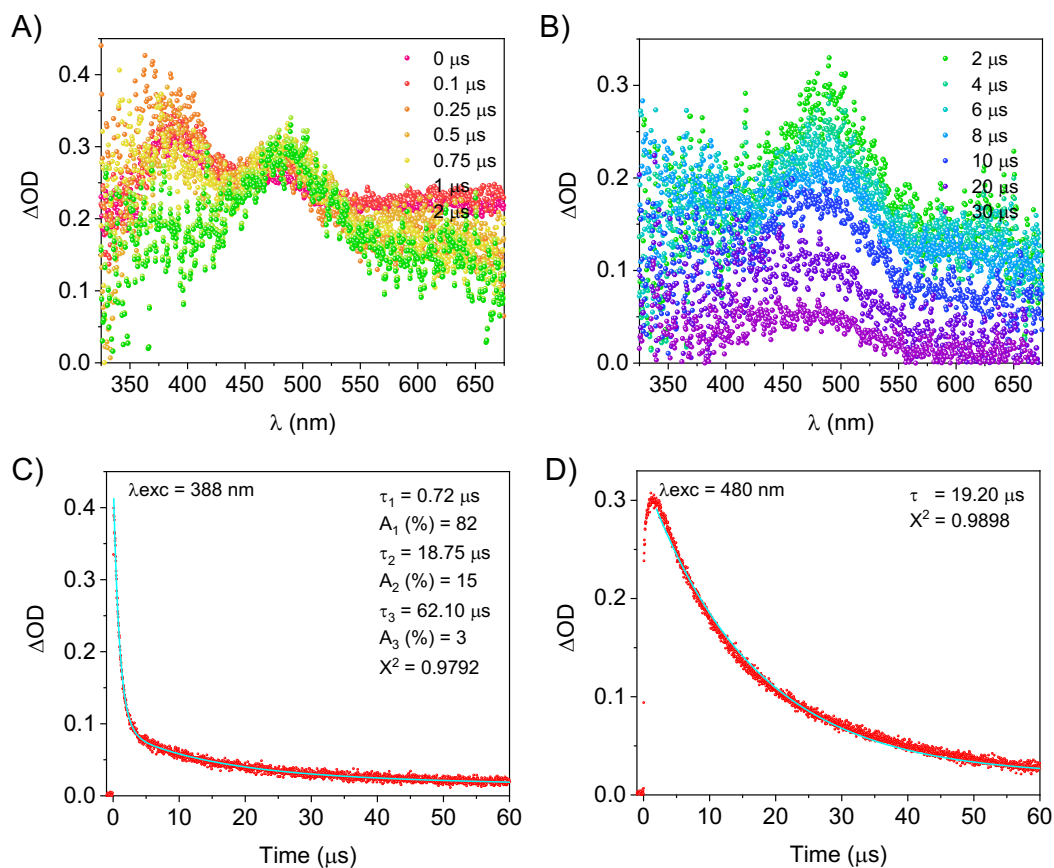

**Fig. S10** A and B) Transient absorption spectra ( $\lambda_{\text{exc}} = 355 \text{ nm}$ ) for **BiFePF-15** MOFs in aqueous solution suspension at different timescales under  $\text{N}_2$ . C and D) Transient decay traces ( $\lambda_{\text{exc}} = 355 \text{ nm}$ ) for **BiFePF-15** MOFs monitored at (C)  $\lambda_{\text{mon}} = 388 \text{ nm}$  or (D)  $\lambda_{\text{mon}} = 480 \text{ nm}$ , respectively. The fitting curves (blue) have been included in all cases.



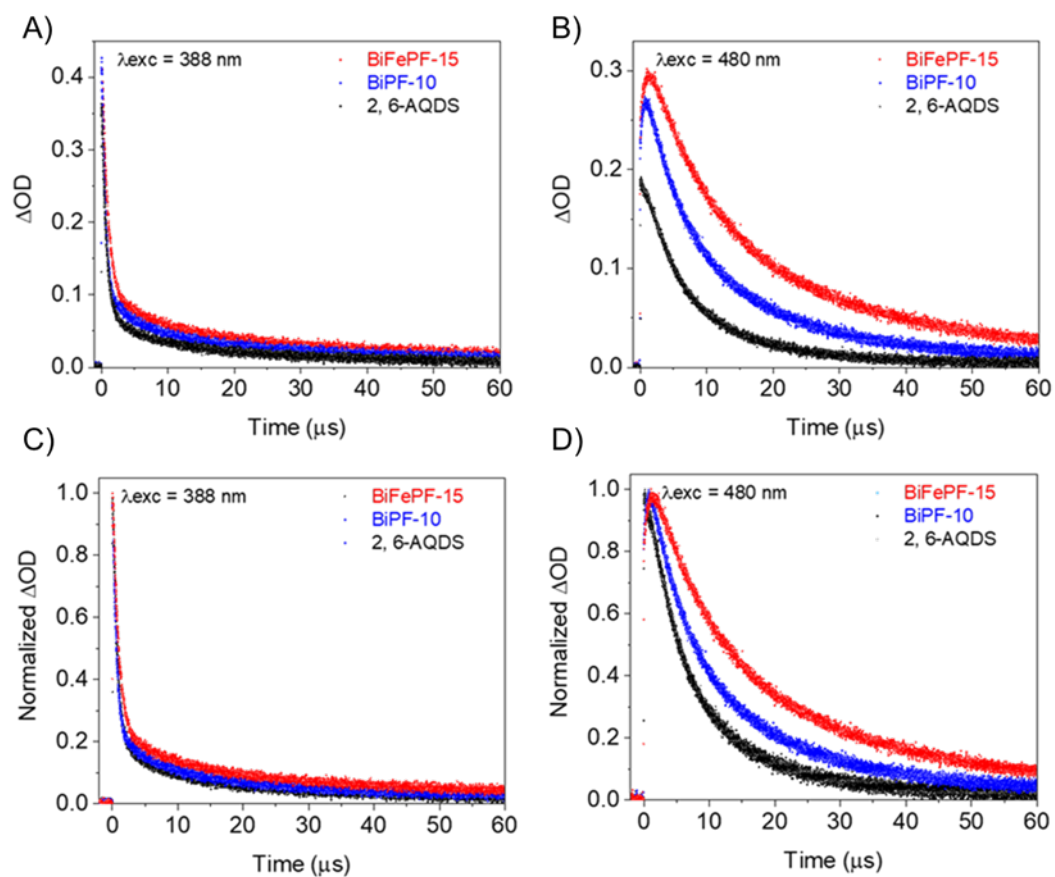

**Fig. S11** Comparative of the transient decay traces (A and B) and normalized (C and D) after laser excitation at  $\lambda_{exc} = 355$  nm for **2, 6-AQDS** ligand and **BiPF-10** and **BiFePF-15** MOFs aqueous samples under  $N_2$  monitored at (A and C)  $\lambda_{mon} = 388$  nm or (B and D)  $\lambda_{mon} = 480$  nm, respectively.

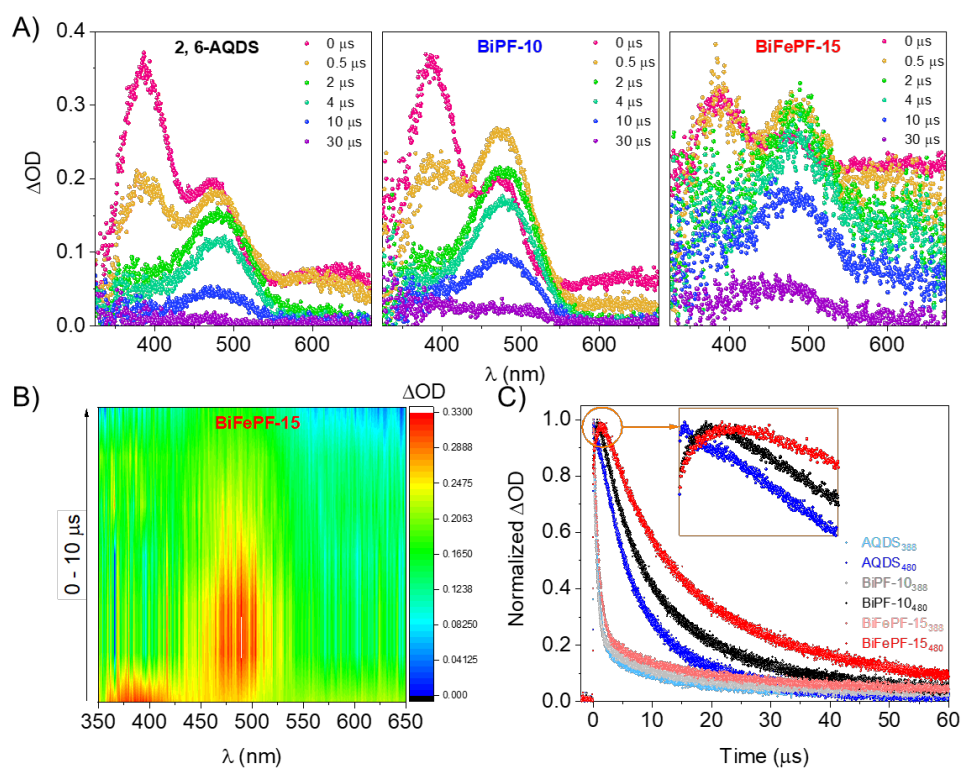

**Fig. S12** A) Transient absorption spectra ( $\lambda_{exc} = 355$  nm) at different timescales and C) comparative of the normalized transient decay traces after laser excitation at  $\lambda_{exc} = 355$  nm ( $\lambda_{mon} = 388$  and 480 nm) for **2, 6-AQDS**, **BiPF-10**, and **BiFePF-15** in water under  $N_2$ . B) 2D mapping transient absorption spectra of BiFePF-15 in water under  $N_2$ .

**TAS Experiments of 2, 6-AQDS in the presence of Na<sub>2</sub>SO<sub>3</sub>.** First, in the presence of a high concentration of strong reducing agent (as sodium nitrite or OH<sup>-</sup>), the semiquinone radical anion (2, 6-AQDS<sup>•-</sup>) is reported to be produced by electron transfer, which protonates under acidic conditions to produce the neutral radical (2, 6-AQDS<sup>•</sup>).<sup>10</sup> The radical anions produced on AQ possess moderate reduction potentials in their ground states (e.g., E<sup>0</sup>(Aq/Aq<sup>-</sup>) and E<sup>0</sup>(Aq-OH/Aq-OH<sup>-</sup>) are -0.82 and -0.55 V vs. saturated calomel electrode (SCE), respectively) and can be accessed electrochemically, chemically, or through photoinduced single-electron transfer (SET) processes in the presence of a suitable electron donor under an inert atmosphere. In general, AQ and its derivatives form colored radical anions upon single-electron reduction. Eggins as well as Lund and Eriksen showed that the excited states of the colored radical anions of AQ are powerful reductants and can be used for photocatalytic reductive transformations.<sup>11, 12</sup>

In our case, we observe transient absorption peaks between 350-425 nm (with maximum at 385 nm) and 450-550 nm (with maximum at 520 nm) and weak absorption at wavelengths >700 nm (Fig. S13A-B, S14A-B, S15A-B, S17). These characteristic bands are consistent with previously reported anion radical 2, 6-AQDS<sup>•-</sup> (and other AQ derivatives).<sup>13-15</sup> Radical anion 2, 6-AQDS<sup>•-</sup> exhibited a longer  $\tau$  of 70-80  $\mu$ s under inert atmosphere (Fig. S13C and S13D). Owing to the strong overlap of the remained triplet (at 388 nm) and the radical anion absorption bands (385 and 520 nm, respectively), an accurate triplet lifetime was difficult to found. Moore *et al.* defined a quenching rate constant for the triplet state by nitrite of  $1.4 \times 10^9 \text{ M}^{-1} \text{ s}^{-1}$ , involving a strong deactivation of triplets by reductive agents.<sup>16</sup> Studies through fs-TAS by Lewis *et al.* demonstrated that the AQ radical anions are formed within 1 ps following laser excitation and the generation of the AQ radical anions in aqueous media is preferably that the formation of AQ $\cdots$ H<sub>2</sub>O adducts (> 10 ps after pulse).<sup>14, 17</sup>

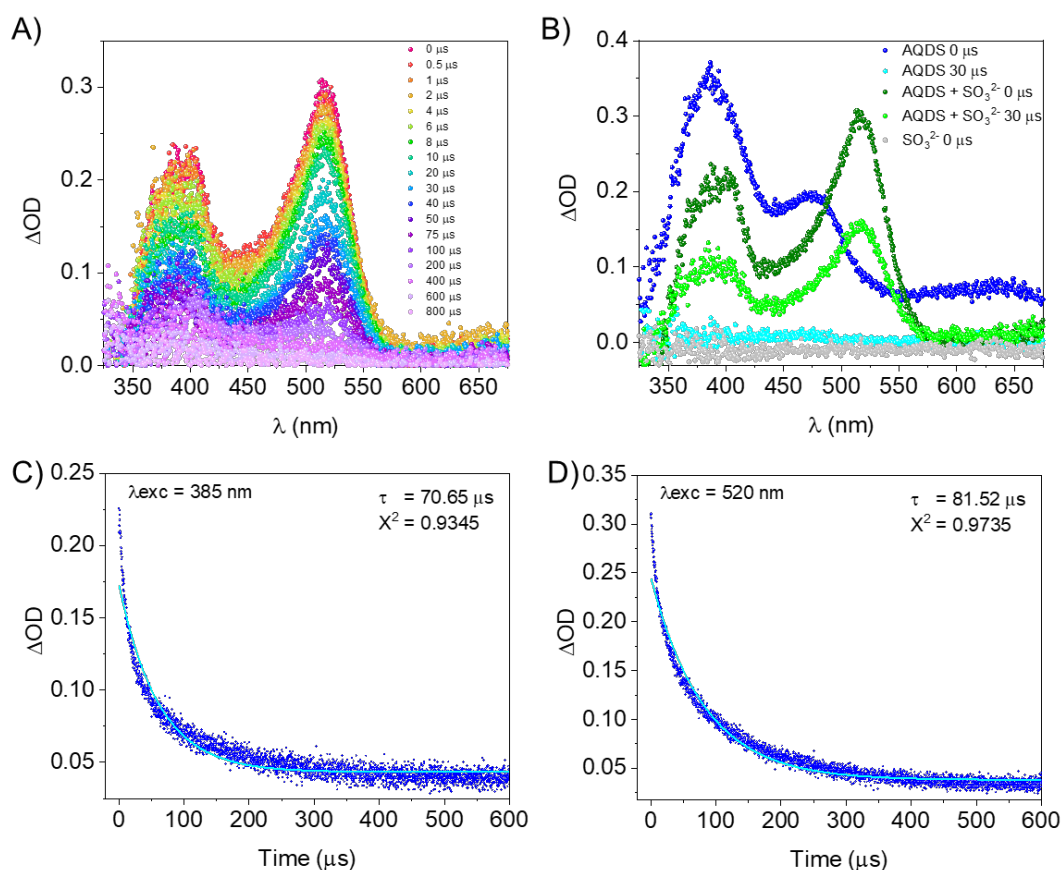

**Fig. S13** A) Transient absorption spectra ( $\lambda_{exc} = 355$  nm) for **2, 6-AQDS** ligand in the presence of 0.5 M  $Na_2SO_3$  in deaerated aqueous solution at different timescales. B) Comparative of the transient absorption spectrum for **2, 6-AQDS** ligand in absence or presence of 0.5 M  $Na_2SO_3$  immediately after laser pulse 0  $\mu s$  or upon 30  $\mu s$ . The signal for 0.5 M  $Na_2SO_3$  is included for comparison. C and D) Transient decay traces ( $\lambda_{exc} = 355$  nm) for **2, 6-AQDS** ligand monitored at (C)  $\lambda_{mon} = 385$  nm or (D)  $\lambda_{mon} = 520$  nm, respectively. The fitting curves (blue) have been included in all cases.

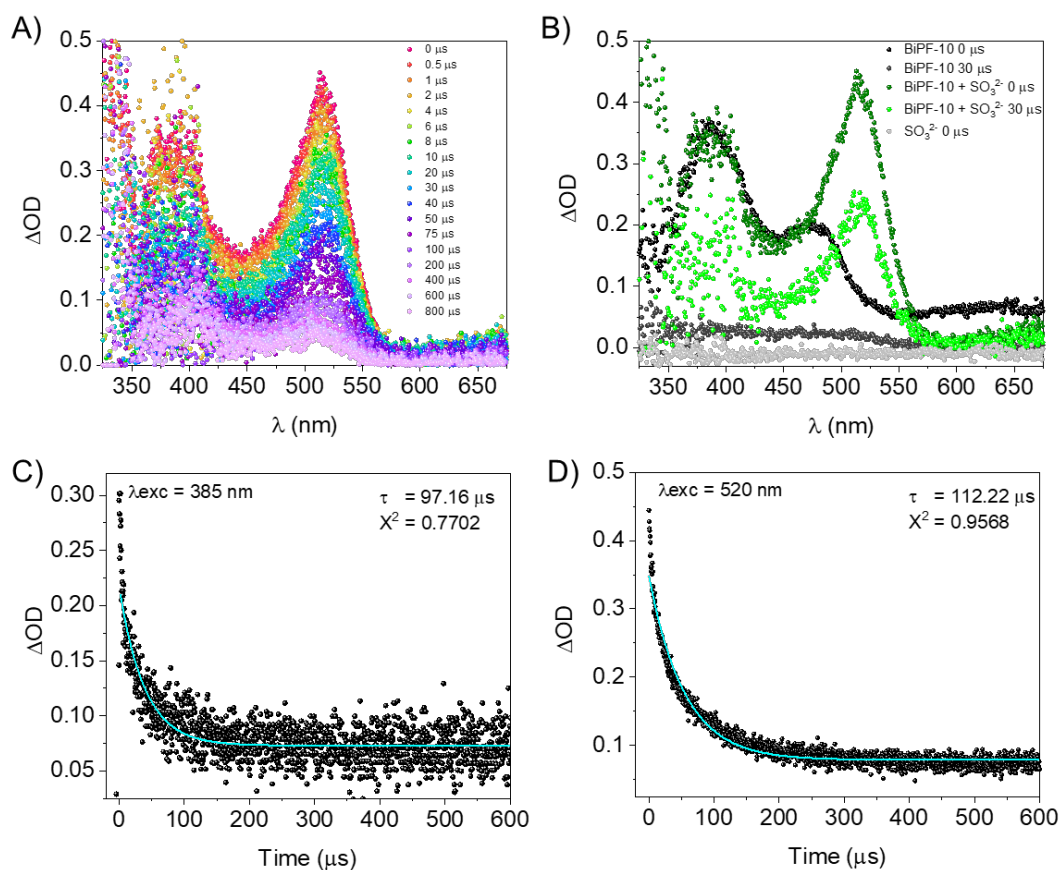

**Fig. S14** A) Transient absorption spectra ( $\lambda_{\text{exc}} = 355$  nm) for **BiPF-10** MOFs in the presence of 0.5 M  $\text{Na}_2\text{SO}_3$  in aqueous solution suspension at different timescales under  $\text{N}_2$ . B) Comparative of the transient absorption spectrum for **BiPF-10** MOFs in absence or presence of  $\text{Na}_2\text{SO}_3$  0.5 M immediately after laser pulse 0  $\mu\text{s}$  or upon 30  $\mu\text{s}$ . The signal for 0.5 M  $\text{Na}_2\text{SO}_3$  is included for comparison. C and D) Transient decay traces ( $\lambda_{\text{exc}} = 355$  nm) for **BiPF-10** MOFs monitored at (C)  $\lambda_{\text{mon}} = 385$  nm or (D)  $\lambda_{\text{mon}} = 520$  nm, respectively. The fitting curves (blue) have been included in all cases.

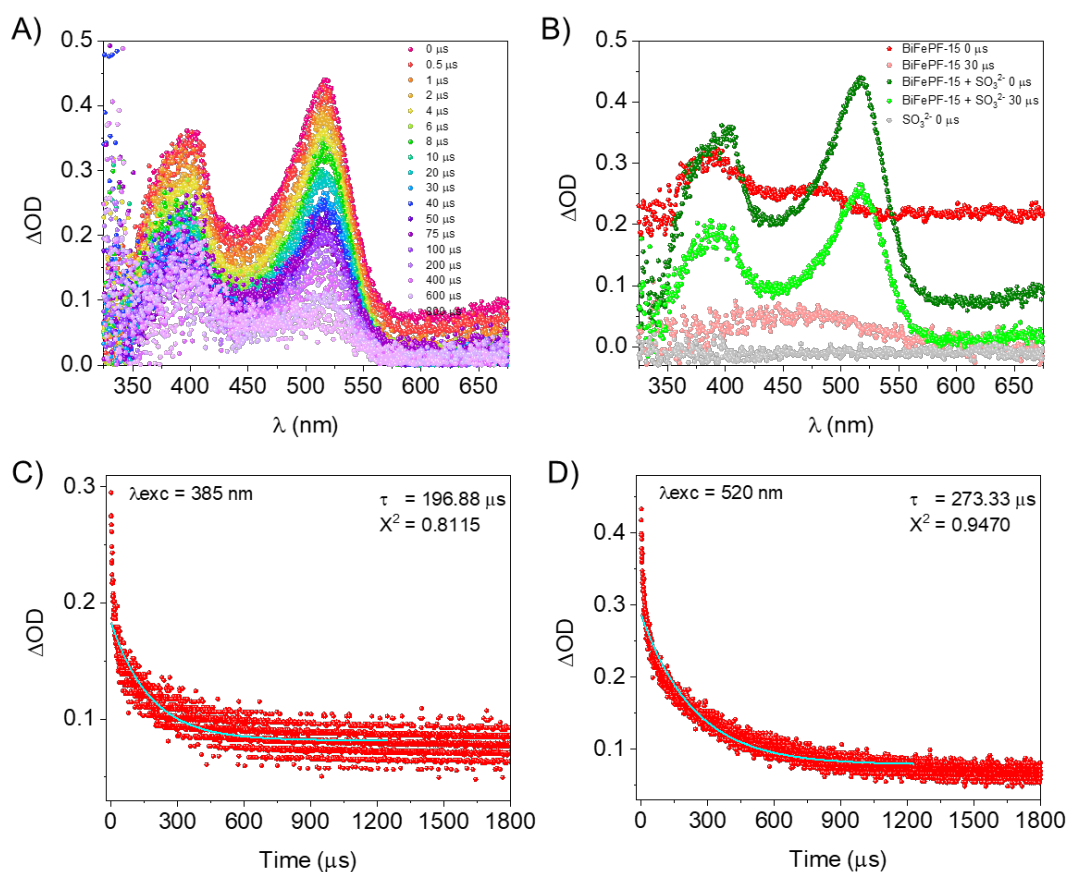

**Fig. S15** A) Transient absorption spectra ( $\lambda_{\text{exc}} = 355 \text{ nm}$ ) for **BiFePF-15** MOFs in the presence of 0.5 M  $\text{Na}_2\text{SO}_3$  in aqueous solution suspension at different timescales under  $\text{N}_2$ . B) Comparative of the transient absorption spectrum for **BiFePF-15** MOF in absence or presence of  $\text{Na}_2\text{SO}_3$  0.5 M immediately after laser pulse 0  $\mu\text{s}$  or upon 30  $\mu\text{s}$ . The signal for 0.5 M  $\text{Na}_2\text{SO}_3$  is included for comparison. C and D) Transient decay traces ( $\lambda_{\text{exc}} = 355 \text{ nm}$ ) for **BiFePF-15** MOFs monitored at (C)  $\lambda_{\text{mon}} = 385 \text{ nm}$  or (D)  $\lambda_{\text{mon}} = 520 \text{ nm}$ , respectively. The fitting curves (blue) have been included in all cases.

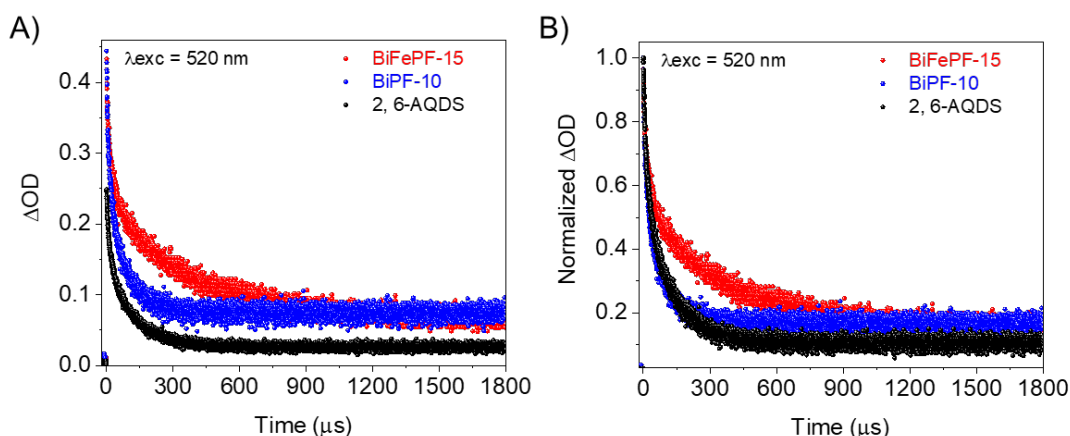

**Fig. S16** Comparative of the (A) transient decay traces and (B) normalized after laser excitation at  $\lambda_{\text{exc}} = 355 \text{ nm}$  ( $\lambda_{\text{mon}} = 520 \text{ nm}$ ) for **2, 6-AQDS** ligand, **BiPF-10** and **BiFePF-15** MOFs in the presence of aqueous 0.5 M  $\text{Na}_2\text{SO}_3$  under  $\text{N}_2$ .

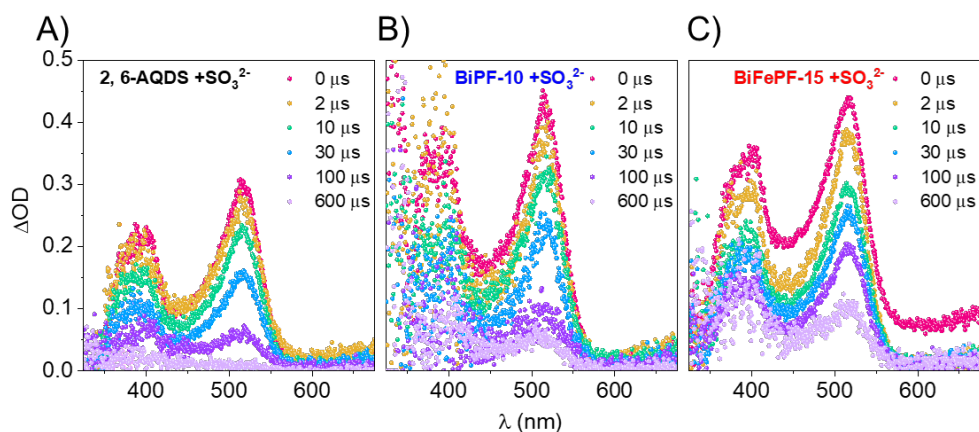

**Fig. S17** Comparative transient absorption spectra ( $\lambda_{exc} = 355 \text{ nm}$ ) for A) 2, 6-AQDS, B) BiPF-10 and C) BiFePF-15 in the presence of 0.5 M  $\text{Na}_2\text{SO}_3$  in aqueous solution suspension at different timescales under  $\text{N}_2$ .

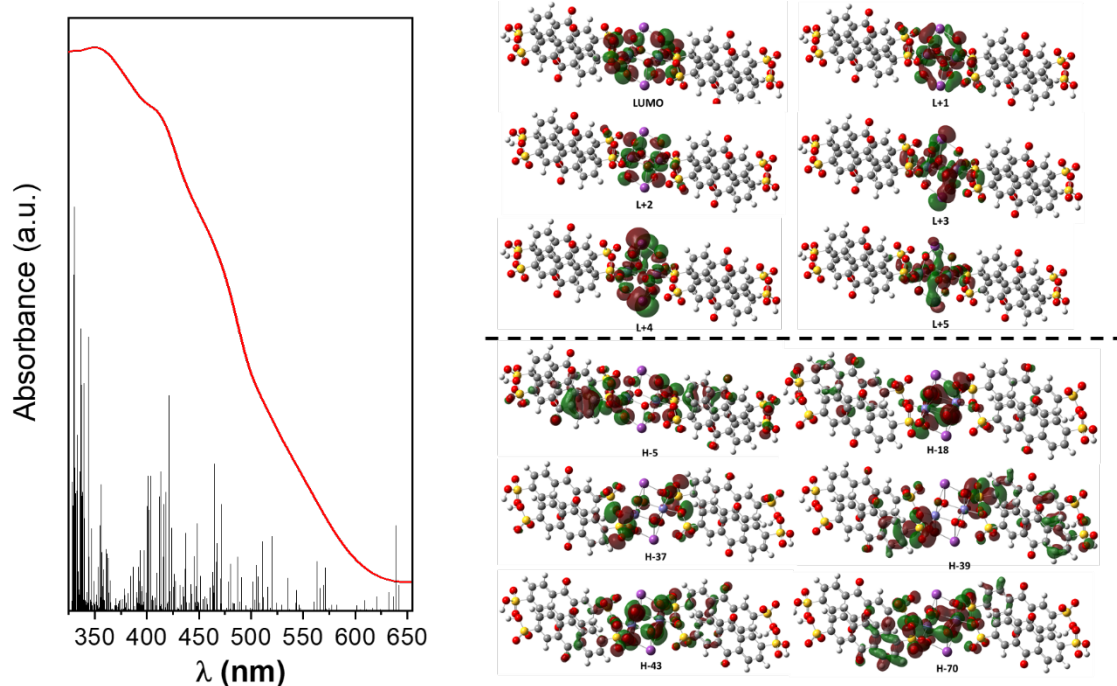

**Fig. S18** UV-Vis spectrum of BiFePF-15 and TD-DFT (6-31G\*\*) calculated excitation energies (vertical bars) and selected molecular orbitals contributing to ligand metal charge transfer transitions.

**Table S3** Reported bare MOFs used as photo-electrodes for H<sub>2</sub> production.

| Catalysts                                         | Light source                                    | Light intensity (mW cm <sup>-2</sup> ) | Sacrificial agents                  | Photosensitizers | Co-catalysts | Applied potential (V vs. RHE) | H <sub>2</sub> production rate (μmol h <sup>-1</sup> )         | Ref.             |
|---------------------------------------------------|-------------------------------------------------|----------------------------------------|-------------------------------------|------------------|--------------|-------------------------------|----------------------------------------------------------------|------------------|
| MOF-525 (Zr-MOF)                                  | Solar simulator (AM 1.5 solar filter)           | 100                                    | TEOA                                | TCPD linker      | --           | -0.2                          | 0.016                                                          | 18               |
| IEF-5 (Bi-MOF)                                    | Xe lamp (AM 1.5 solar filter)                   | 253                                    | Na <sub>2</sub> SO <sub>3</sub>     | DTTDC linker     | --           | 1.05                          | 2.35                                                           | 19               |
| MUV-11 (Ti-MOF)                                   | Solar simulator                                 | 253                                    | Na <sub>2</sub> SO <sub>3</sub>     | --               | 1% Pt        | 1.2                           | 4.5                                                            | 20               |
| [La(TTCA)(H <sub>2</sub> O)]·DMF·H <sub>2</sub> O | High pressure mercury lamp                      | --                                     | NaOAc/HOAc                          | --               | --           | 2.26                          | 1.27 for O <sub>2</sub> ; 2.48 for H <sub>2</sub>              | 21               |
| Cu <sub>3</sub> HHAE <sub>2</sub>                 | Xe lamp (AM 1.5G filter)                        | 100                                    | --                                  | HHAE             | --           | -0.7                          | photocurrent density (~260 μA cm <sup>-2</sup> ) at 0V vs. RHE | 22               |
| <b>BiFePF-15</b>                                  | <b>Simulated 1 Sun solar simulator (AM 1.5)</b> | <b>240</b>                             | <b>Na<sub>2</sub>SO<sub>3</sub></b> | <b>--</b>        | <b>--</b>    | <b>1.0</b>                    | <b>1229.83</b>                                                 | <b>This work</b> |



## References

- 1 D. Sasikumar, A. T. John, J. Sunny and M. Hariharan, *Chem. Soc. Rev.*, 2020, **49**, 6122-6140.
- 2 H. J. van Ramesdonk, B. H. Bakker, M. M. Groeneveld, J. W. Verhoeven, B. D. Allen, J. P. Rostron and A. Harriman, *J. Phys. Chem. A*, 2006, **110**, 13145-13150.
- 3 K. Tickle and F. Wilkinson, *Trans. Faraday Soc.*, 1965, **61**, 1981.
- 4 A. A. Lamola and G. S. Hammond, *J. Chem. Phys.*, 1965, **43**, 2129-2135.
- 5 S. Goia, M. A. P. Turner, J. M. Woolley, M. D. Horbury, A. J. Borrill, J. J. Tully, S. J. Cobb, M. Staniforth, N. D. M. Hine, A. Burriss, J. V. Macpherson, B. R. Robinson and V. G. Stavros, *Chem. Sci.*, 2022, **13**, 486-496.
- 6 J. Hankache and O. S. Wenger, *Phys. Chem. Chem. Phys.*, 2012, **14**, 2685-2692.
- 7 P. R. Maddigapu, A. Bedini, C. Minero, V. Maurino, D. Vione, M. Brigante, G. Mailhot and M. Sarakha, *Photochem. Photobiol. Sci.*, 2010, **9**, 323-330.
- 8 I. Loeff, A. Treinin and H. Linschitz, *J. Phys. Chem.*, 1983, **87**, 2536-2544.
- 9 A. Harriman and A. Mills, *Photochem. Photobiol.*, 2008, **33**, 619-625.
- 10 J. Metcalfe, *J. Chem. Soc. Faraday Trans. 1 Phys. Chem. Condens. Phases*, 1983, **79**, 1721.
- 11 B. R. Eggins and P. K. J. Robertson, *J. Chem. Soc. Faraday Trans.*, 1994, **90**, 2249.
- 12 P. Nelleborg, H. Lund and J. Eriksen, *Tetrahedron Lett.*, 1985, **26**, 1773-1776.
- 13 J. Hankache and O. S. Wenger, *Chem. Commun.*, 2011, **47**, 10145-10147.
- 14 F. D. Lewis, A. K. Thazhathveetil, T. A. Zeidan, J. Vura-Weis and M. R. Wasielewski, *J. Am. Chem. Soc.*, 2010, **132**, 444-445.
- 15 A. Mau, W. Sasse, *Aust. J. Chem.*, 1982, **35**, 1723.
- 16 J. N. Moore, D. Phillips, N. Nakashima and K. Yoshihara, *J. Chem. Soc. Faraday Trans.*, 1986, **82**, 745.
- 17 R. Carmieli, A. L. Smeigh, S. M. M. Conron, A. K. Thazhathveetil, M. Fuki, Y. Kobori, F. D. Lewis and M. R. Wasielewski, *J. Am. Chem. Soc.*, 2012, **134**, 11251-11260.
- 18 R. Ifraemov, R. Shimoni, W. H. He, G. M. Peng and I. Hod, *J. Mater. Chem. A*, 2019, **7**, 3046-3053.
- 19 A. García-Sánchez, M. Gomez-Mendoza, M. Barawi, I. J. Villar-Garcia, M. Liras, F. Gándara and V. A. D. O'Shea, *J. Am. Chem. Soc.*, 2020, **142**, 318-326.
- 20 N. M. Padial, J. Castells-Gil, N. Almora-Barrios, M. Romero-Angel, I. da Silva, M. Barawi, A. García-Sánchez, V. A. D. O'Shea and C. Martí-Gastaldo, *J. Am. Chem. Soc.*, 2019, **141**, 13124-13133.
- 21 Y. N. Gong, T. Ouyang, C. T. He and T. B. Lu, *Chem. Sci.*, 2016, **7**, 1070-1075.
- 22 Y. Lu, H. X. Zhong, J. Li, A. M. Dominic, Y. M. Hu, Z. Gao, Y. L. Jiao, M. J. Wu, H. Y. Qi, C. H. Huang, L. J. Wayment, U. Kaiser, E. Spiecker, I. M. Weidinger, W. Zhang, X. L. Feng and R. H. Dong, *Angew. Chem. Int. Ed.*, 2022, **61**, e202208163.
